# Supplementary material for: Characterization of Schizophrenia Adverse Drug Interactions through a Network Approach and Drug Classification
Source: Hindawi journal article supplement (doi:10.1155/2013/458989), 2013-01-01
Supplement: f1 [file 458989.f1.pdf]

## Additional file

**TABLE S1.** Adverse Interaction Categories of SCZ Drugs Based on the ATC First-level Classification

| <b>Interaction Category<br/>(ATC First-level Classification )</b>             | <b>Number of Non-<br/>SCZ Drugs</b> | <b>Number of<br/>Interactions</b> | <b>Percentage of<br/>Drugs</b> |
|-------------------------------------------------------------------------------|-------------------------------------|-----------------------------------|--------------------------------|
| Nervous system (N)                                                            | 92                                  | 339                               | 0.3294                         |
| Antiinfectives for systemic use (J)                                           | 29                                  | 157                               | 0.1526                         |
| Cardiovascular system (C)                                                     | 26                                  | 105                               | 0.1020                         |
| Alimentary tract and metabolism (A)                                           | 22                                  | 82                                | 0.0797                         |
| Antineoplastic and<br>immunomodulating agents (L)                             | 15                                  | 68                                | 0.0661                         |
| Sensory organs (S)                                                            | 18                                  | 63                                | 0.0612                         |
| Dermatologicals (D)                                                           | 5                                   | 51                                | 0.0496                         |
| Genito-urinary system and sex<br>hormones (G)                                 | 3                                   | 50                                | 0.0486                         |
| Antiparasitic products, insecticides<br>and repellents (P)                    | 8                                   | 49                                | 0.0476                         |
| Respiratory system (R)                                                        | 4                                   | 48                                | 0.0466                         |
| Various (V)                                                                   | 1                                   | 8                                 | 0.0078                         |
| Systemic hormonal preparations,<br>excluding sex hormones and insulins<br>(H) | 2                                   | 5                                 | 0.0049                         |
| Musculo-skeletal system (M)                                                   | 3                                   | 3                                 | 0.0029                         |
| Blood and blood forming organs (B)                                            | 1                                   | 1                                 | 0.0010                         |

**Table S2. Adverse Interaction Categories of SCZ Drugs According to ATC Third-level Classification**

| <b>ATC Code</b> | <b>Number of Interactions of Typical SCZ Drugs</b> | <b>Percentage of Typical SCZ Drugs Interactions (%)</b> | <b>Number of Interactions of Atypical SCZ Drugs</b> | <b>Percentage of Atypical SCZ Drugs Interactions (%)</b> |
|-----------------|----------------------------------------------------|---------------------------------------------------------|-----------------------------------------------------|----------------------------------------------------------|
| A02B            | 0                                                  | 0                                                       | 1                                                   | 0.16                                                     |
| C03X            | 0                                                  | 0                                                       | 1                                                   | 0.16                                                     |
| C09A            | 0                                                  | 0                                                       | 1                                                   | 0.16                                                     |
| D07A            | 0                                                  | 0                                                       | 1                                                   | 0.16                                                     |
| L01B            | 0                                                  | 0                                                       | 2                                                   | 0.31                                                     |
| A03B            | 1                                                  | 0.16                                                    | 0                                                   | 0                                                        |
| B01A            | 1                                                  | 0.16                                                    | 0                                                   | 0                                                        |
| C02A            | 1                                                  | 0.16                                                    | 0                                                   | 0                                                        |
| D05B            | 1                                                  | 0.16                                                    | 0                                                   | 0                                                        |
| H05B            | 1                                                  | 0.16                                                    | 0                                                   | 0                                                        |
| M03C            | 1                                                  | 0.16                                                    | 0                                                   | 0                                                        |
| N05A            | 1                                                  | 0.16                                                    | 0                                                   | 0                                                        |
| A10B            | 2                                                  | 0.31                                                    | 0                                                   | 0                                                        |
| C08D            | 2                                                  | 0.31                                                    | 0                                                   | 0                                                        |
| M03B            | 2                                                  | 0.31                                                    | 0                                                   | 0                                                        |
| R02A            | 2                                                  | 0.31                                                    | 0                                                   | 0                                                        |
| S01F            | 3                                                  | 0.47                                                    | 0                                                   | 0                                                        |
| N04A            | 5                                                  | 0.78                                                    | 0                                                   | 0                                                        |

---

|      |    |      |    |      |
|------|----|------|----|------|
| A03A | 8  | 1.26 | 0  | 0    |
| V08A | 8  | 1.26 | 0  | 0    |
| R01B | 9  | 1.41 | 0  | 0    |
| S01E | 13 | 2.04 | 0  | 0    |
| A08A | 45 | 7.06 | 0  | 0    |
| C02K | 1  | 0.16 | 1  | 0.16 |
| S03A | 1  | 0.16 | 1  | 0.16 |
| N05B | 1  | 0.16 | 11 | 1.73 |
| C03B | 2  | 0.31 | 1  | 0.16 |
| C10A | 2  | 0.31 | 1  | 0.16 |
| H01C | 2  | 0.31 | 1  | 0.16 |
| L03A | 2  | 0.31 | 1  | 0.16 |
| N01A | 2  | 0.31 | 1  | 0.16 |
| N07B | 2  | 0.31 | 1  | 0.16 |
| J04A | 2  | 0.31 | 6  | 0.94 |
| A04A | 3  | 0.47 | 1  | 0.16 |
| C01E | 3  | 0.47 | 1  | 0.16 |
| G04C | 3  | 0.47 | 1  | 0.16 |
| G01A | 3  | 0.47 | 5  | 0.78 |
| N05C | 3  | 0.47 | 10 | 1.57 |
| N03A | 3  | 0.47 | 21 | 3.30 |
| P01C | 4  | 0.63 | 1  | 0.16 |
| N02A | 5  | 0.78 | 1  | 0.16 |
| L04A | 9  | 1.41 | 5  | 0.78 |
| C07A | 11 | 1.73 | 1  | 0.16 |

---

---

|      |    |       |    |      |
|------|----|-------|----|------|
| C08C | 12 | 1.88  | 5  | 0.78 |
| D01A | 13 | 2.04  | 4  | 0.63 |
| J01F | 13 | 2.04  | 9  | 1.41 |
| J02A | 13 | 2.04  | 9  | 1.41 |
| J05A | 13 | 2.04  | 17 | 2.67 |
| A03F | 14 | 2.20  | 3  | 0.47 |
| L02B | 14 | 2.20  | 6  | 0.94 |
| N07X | 14 | 2.20  | 8  | 1.26 |
| G04B | 16 | 2.51  | 5  | 0.78 |
| J01M | 18 | 2.83  | 1  | 0.16 |
| L01X | 21 | 3.30  | 11 | 1.73 |
| N04B | 25 | 3.92  | 14 | 2.20 |
| N06B | 28 | 4.40  | 2  | 0.31 |
| R06A | 28 | 4.40  | 8  | 1.26 |
| P01B | 32 | 5.02  | 9  | 1.41 |
| S01A | 32 | 5.02  | 9  | 1.41 |
| C01B | 34 | 5.34  | 11 | 1.73 |
| N06D | 56 | 8.79  | 23 | 3.61 |
| N06A | 71 | 11.15 | 27 | 4.24 |

---

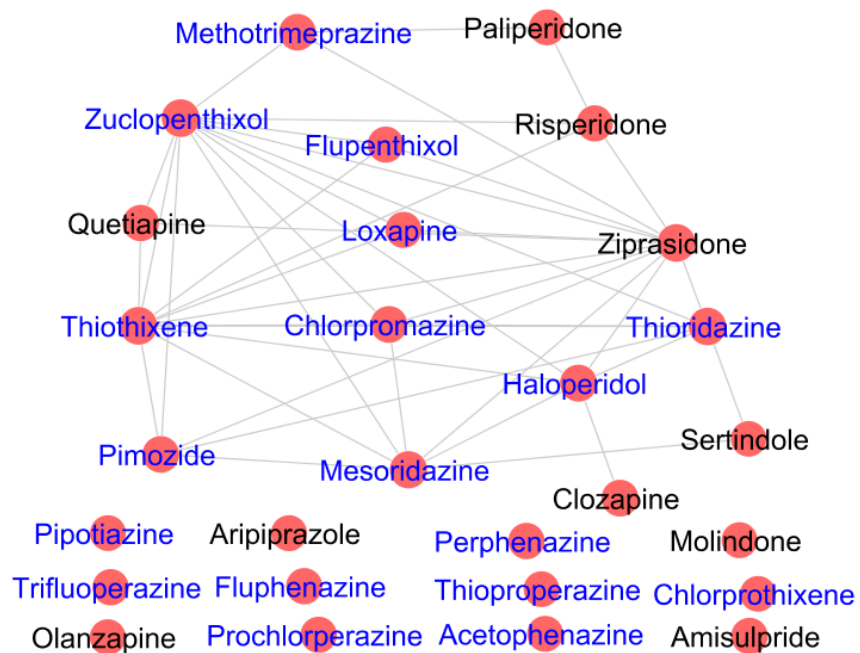

**Figure S1.** Adverse drug-drug interactions among SCZ drugs. Nodes with blue labels are SCZ typical drugs, and nodes with black labels are SCZ atypical drugs.
